# Supplementary material for: Oligomerization and Ca2+/calmodulin control binding of the ER Ca2+-sensors STIM1 and STIM2 to plasma membrane lipids
Source: PubMed Central journal article supplement (PMC3814058; doi:10.1042/bsr20130089), 2013-10-31
Supplement: bsr033e077add.pdf [file bsr033e077add.pdf]

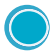

OPEN ACCESS

## SUPPLEMENTARY DATA

# Oligomerization and $\text{Ca}^{2+}$ /calmodulin control binding of the ER $\text{Ca}^{2+}$ -sensors STIM1 and STIM2 to plasma membrane lipids

Rajesh BHARDWAJ\*, Hans-Michael MÜLLER†, Walter NICKEL† and Matthias SEEDORF\*<sup>1</sup>

\*Zentrum für Molekulare Biologie der Universität Heidelberg (ZMBH), DKFZ-ZMBH Alliance, University of Heidelberg, Im Neuenheimer Feld 282, 69120 Heidelberg, Germany, and †Heidelberg University Biochemistry Center, Im Neuenheimer Feld 328, 69120 Heidelberg, Germany

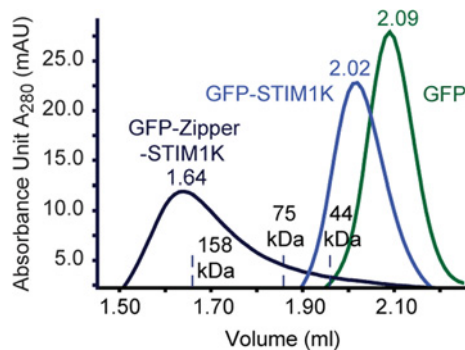

**Figure S1 Addition of a leucine zipper to STIM1 K-rich domain leads to tetramerization**

Elution profiles of 5  $\mu\text{M}$  GFP (green), GFP-STIM1K (blue) and a GFP-tagged construct with yeast GCN4 leucine zipper fused to STIM1 K-rich domain (GFP-Zipper-STIM1K, black) S200 gel-filtration column run are shown. Positions where markers eluted are indicated.

<sup>1</sup> To whom correspondence should be addressed (email [m.seedorf@zmbh.uni-heidelberg.de](mailto:m.seedorf@zmbh.uni-heidelberg.de))

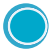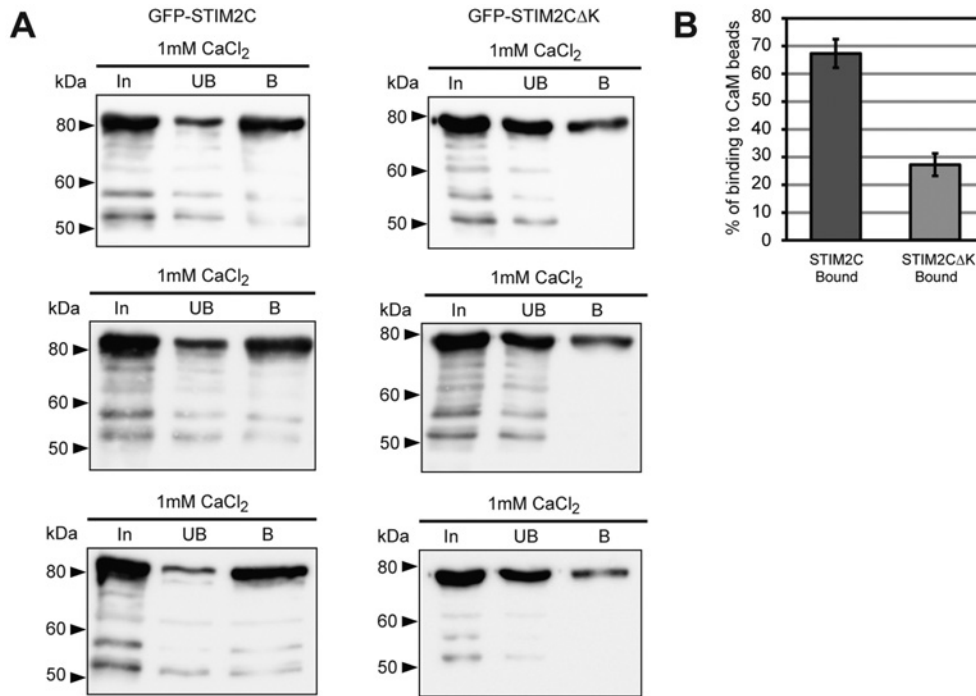

**Figure S2 Western blot quantification of GFP-STIM2C and GFP-STIM2CΔK binding to Ca<sup>2+</sup>/calmodulin beads**  
(A) 1 μM reduced GFP-STIM2C and GFP-STIM2CΔK were incubated with Ca<sup>2+</sup>/CaM beads in presence of 1 mM CaCl<sub>2</sub>. Input (In), unbound (UB) and bound (B) material of three separate experiments were detected by a rabbit polyclonal GFP antibody from Santa Cruz Biotechnology, Inc. (1:5000). (B) Quantification of bound GFP-STIM2C and GFP-STIM2CΔK from three experiments. Bars indicate means ± S.D.

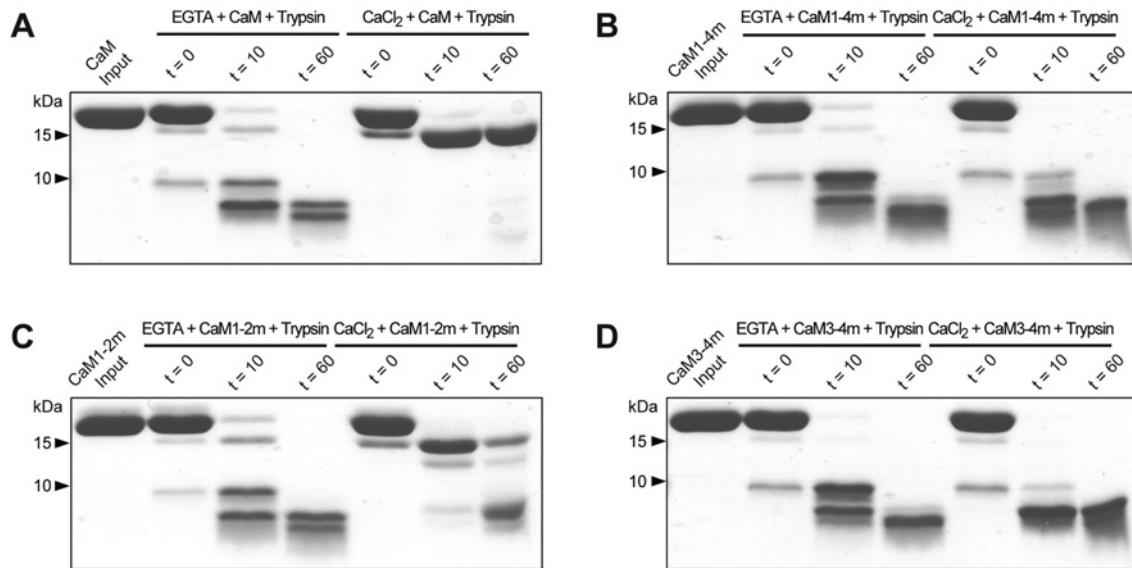

**Figure S3** Protease protection assays with purified CaM and CaM mutants

14  $\mu$ M CaM (A), CaM1-4m (B), CaM1-2m (C) and CaM3-4m (D) in 1 mM EGTA or 0.2 mM CaCl<sub>2</sub> were incubated with 0.02  $\mu$ M trypsin in 20 mM ammonium bicarbonate buffer (pH 8.1) at 20 °C for the indicated times. The proteins were separated by SDS/PAGE and stained with Coomassie Brilliant Blue. The first lane of each gel shows the input of CaM or Ca<sup>2+</sup>-binding mutants of CaM without protease.

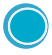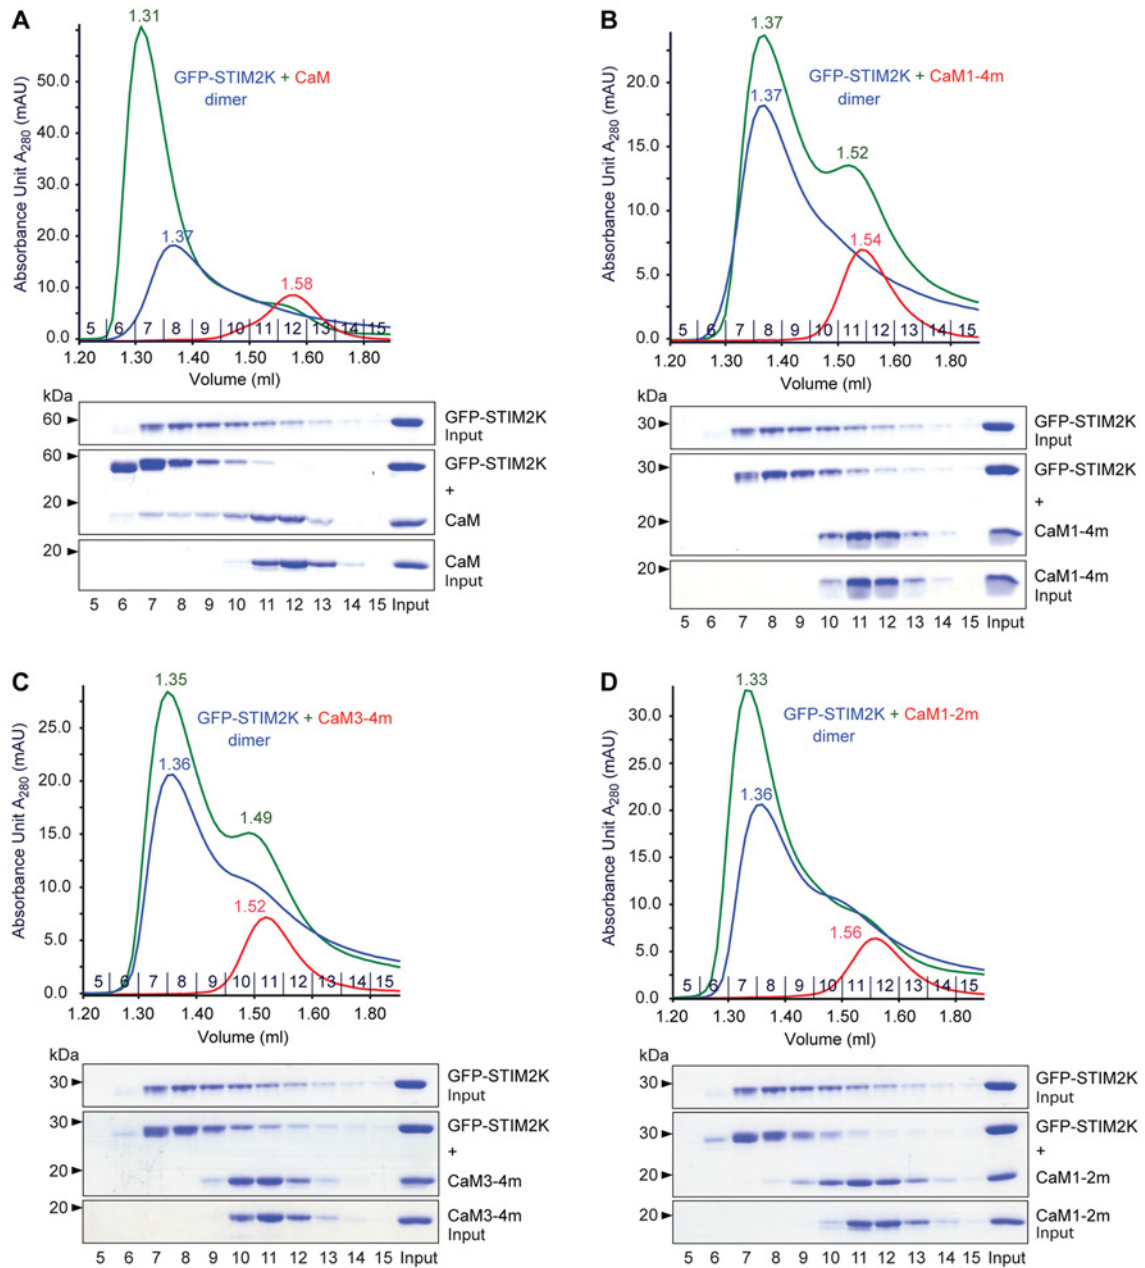

**Figure S4** In solution binding of GFP-STIM2K dimer and calmodulin  
10  $\mu$ M oxidized GFP-STIM2K dimer and 10  $\mu$ M purified CaM (A), CaM1-4m (B), CaM3-4m (C) or CaM1-2m (D) in 1 mM CaCl<sub>2</sub> were separated by gel filtration. The elution profiles of GFP-STIM2K dimer (blue), CaM (red) and complexes (green) with indicated volume for elution peaks are shown. Proteins of the indicated eluted fractions separated by SDS/PAGE and Coomassie Brilliant Blue stained are shown below the chromatograms.

Received 12 August 2013; accepted 15 August 2013

Published as Immediate Publication 17 September 2013, doi 10.1042/BSR20130089
